# Supplementary material
Source: publisher figshare collection journal article supplement (https://acs.figshare.com/ndownloader/files/13372784)
Supplement: Supplementary file 1 [file 13372784]

# Supporting information for:

## Growth Kinetics of Stacks of Lamellar Polymer Crystals

Sumit Majumder<sup>1</sup>, Hanna Busch<sup>2</sup>, Purushottam Poudel<sup>1</sup>,  
Stefan Mecking<sup>2</sup> and Günter Reiter<sup>1,3,\*</sup>

<sup>1</sup>Institute of Physics, University of Freiburg, 79104 Freiburg, Germany

<sup>2</sup>Department of Chemistry, University of Konstanz, 78457 Konstanz, Germany

<sup>3</sup>Freiburg Materials Research Center (FMF), University of Freiburg, 79104 Freiburg, Germany

### 1) Correlation between film thickness and interference colors

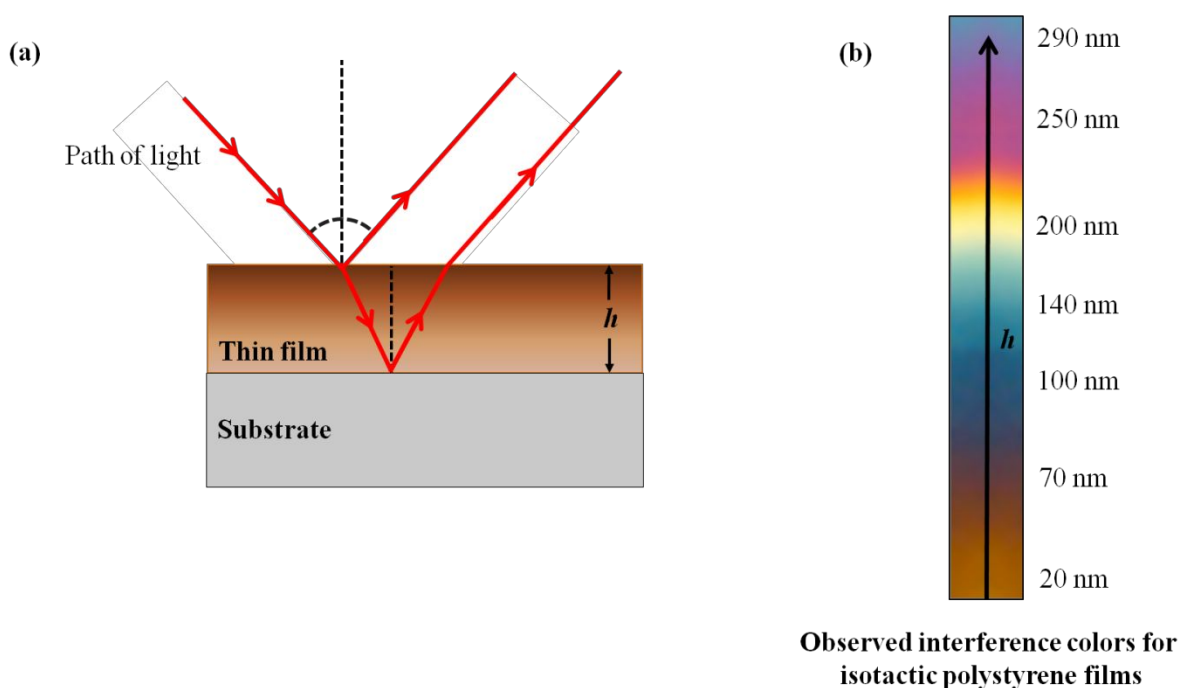

**S1:** (a) Schematic representation of interference of white light reflected from a supported thin film. (b) Color bar indicating the relation between interference colors and film thickness ( $h$ ) as observed for isotactic polystyrene films <sup>1</sup>.

## 2) Grey scale intensity measurement for calculating width of depletion zone

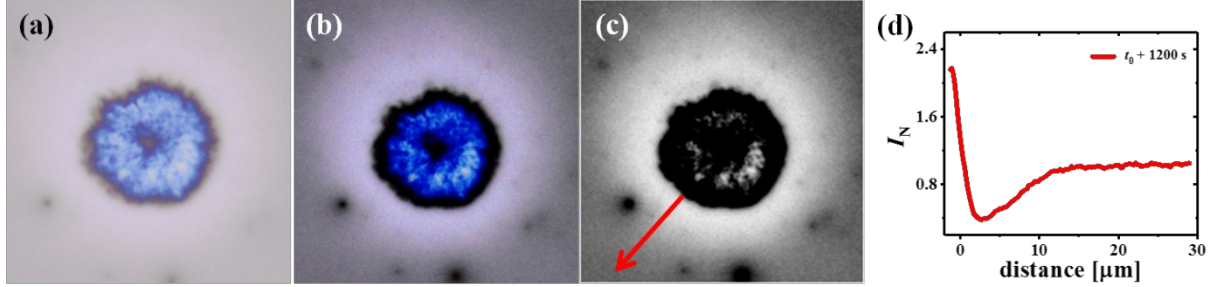

**S2:** (a) Contrast enhanced optical micrograph showing a crystal formed in a  $h \approx 35 \text{ nm}$  thin film after  $t_0 + 1200 \text{ s}$  at  $71^\circ\text{C}$ . (b) Contrast enhanced further to visualize the depletion region surrounding the crystal. (c) Grey scale image of (b). (d) Normalized inverse grey scale intensity ( $I_N$ ) profile along the red line indicated in (c). The intensity values were normalized by the intensity value of the unperturbed film. The images (a) - (c) have a size of  $55 \times 55 \mu\text{m}^2$ .

## 3) *In-situ* measurement of radial advancement of a crystal at $67^\circ\text{C}$

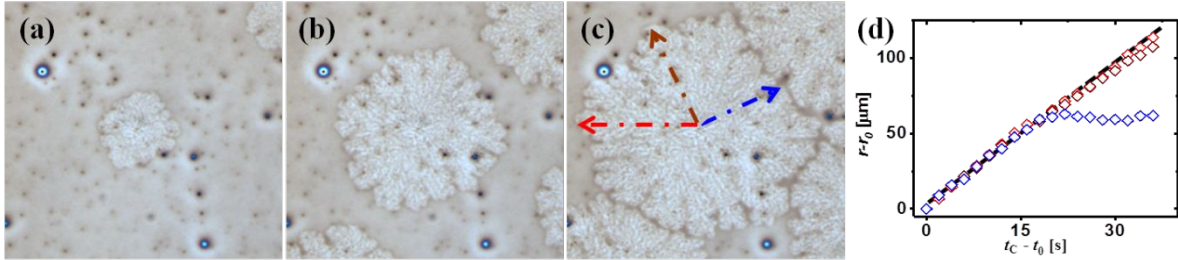

**S3:** Contrast enhanced optical micrographs showing the temporal evolution of crystals formed in an  $h \approx 35 \text{ nm}$  thin film. The branched crystal in (a)-(c) was grown at  $67^\circ\text{C}$  and the crystallization times,  $t_C$ , were  $t_0$ ,  $t_0 + 15 \text{ s}$  and  $t_0 + 30 \text{ s}$ , respectively. (d) Lateral advancement ( $r - r_0$ ) of the branched crystal as a function of  $(t_C - t_0)$ . The black dashed line indicates the initial slope of  $(r - r_0)$  with  $(t_C - t_0)$ . The images (a)-(c) have a size of  $300 \times 300 \mu\text{m}^2$ .

#### 4) *In-situ* measurement of radial advancement of a crystal at 69 °C

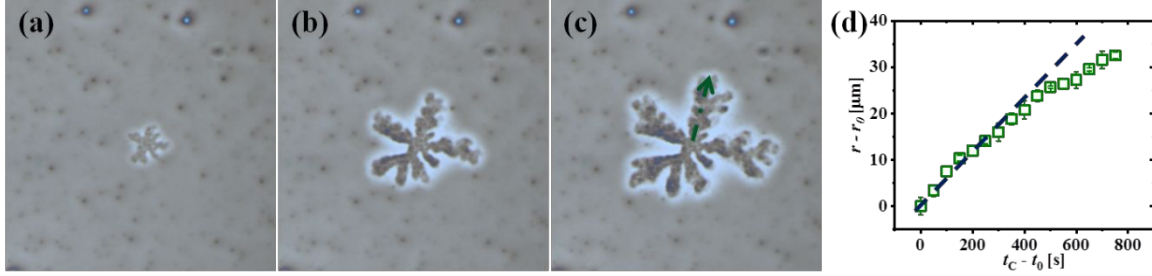

**S4:** Optical micrographs showing temporal evolution of crystals formed in an  $h \approx 35$  nm thin film. The branched crystal in (a)-(c) was grown at 69 °C and the crystallization times,  $t_C$ , were  $t_0$ ,  $t_0 + 400$  s and  $t_0 + 800$  s, respectively. (d) Lateral advancement of the branched crystal as a function of  $(t_C - t_0)$ . The blue dashed line indicates the initial slope of  $(r - r_0)$  with  $(t_C - t_0)$ . The images (a)-(c) have a size of  $280 \times 280 \mu\text{m}^2$ .

#### 5) AFM *in-situ* measurement of radial advancement and height of a crystal at 70 °C

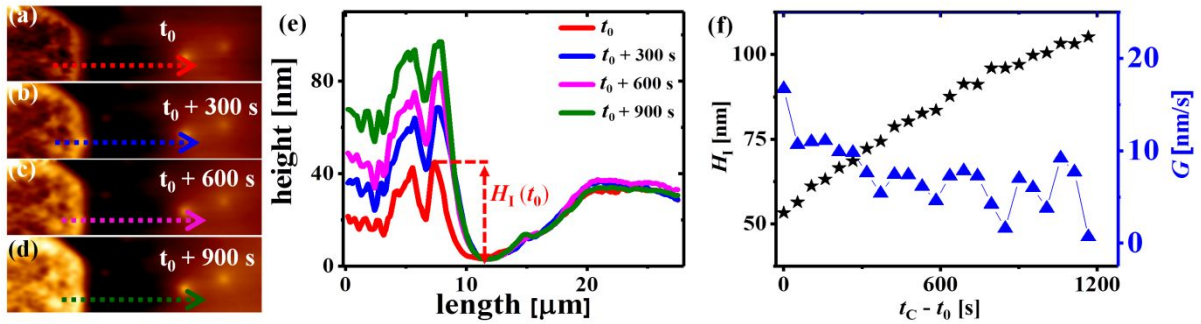

**S5:** (a) – (d) AFM *in-situ* height images showing growth of a crystal at 70 °C in *ca.* 35 nm thin film after  $t_0$ ,  $t_0 + 300$  s,  $t_0 + 600$  s and  $t_0 + 900$  s, respectively. (e) Height profile along the arrows indicated in (a) – (d). (f) Height of the crystal growth front ( $H_f$ ) and lateral growth rate ( $G$ ) as a

function of  $(t_C - t_0)$ , obtained from *in-situ* measurements. The images (a)-(d) have a size of  $48 \times 14 \mu\text{m}^2$ .

#### 6) AFM *in-situ* measurement of radial advancement and height of a crystal at 71 °C

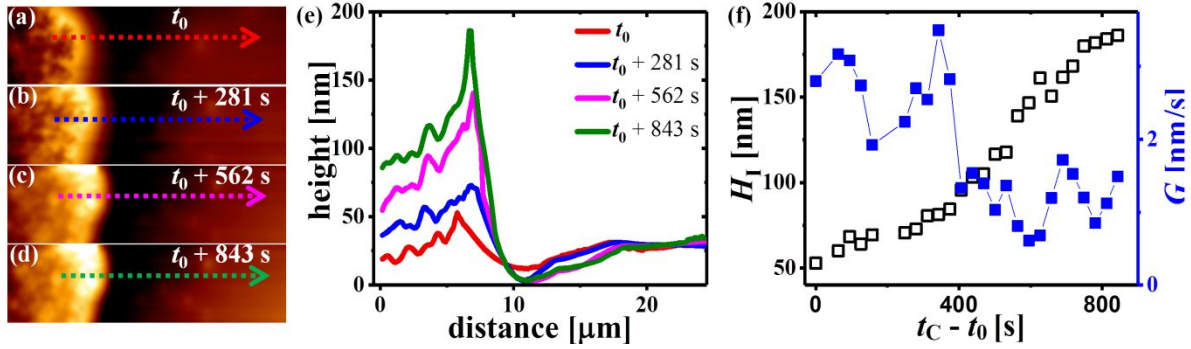

**S6:** (a) – (d) AFM *in-situ* height images showing growth of a crystal at 71 °C in *ca.* 35 nm thin film after  $t_0$ ,  $t_0 + 281$  s,  $t_0 + 562$  s and  $t_0 + 843$  s, respectively. (e) Height profile along the arrows indicated in (a) – (d). (f) Height of the crystal growth front ( $H_1$ ) and lateral growth rate ( $G$ ) as a function of  $(t_C - t_0)$ , obtained from *in-situ* measurements. The images (a)-(d) have a size of  $32 \times 9 \mu\text{m}^2$ .

#### 7) Height profile of a stack of lamellar crystals

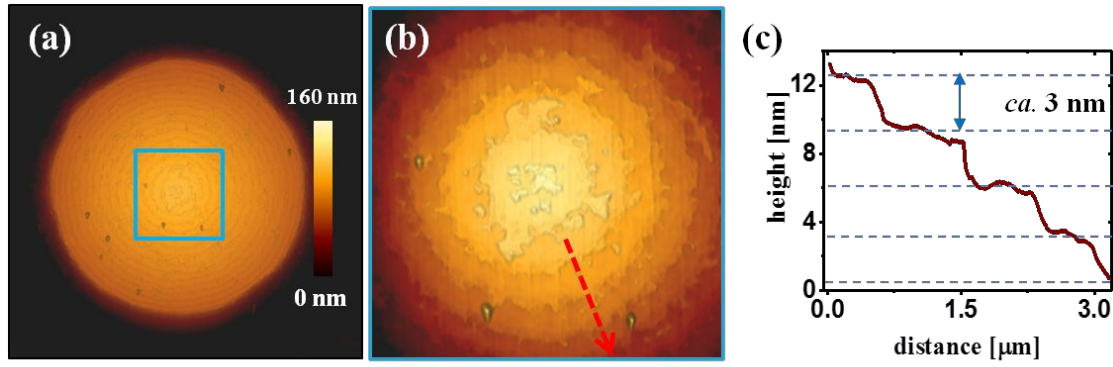

**S7:** (a) AFM topography image of the crystal indicated by the red box in Figure 6 (d) in main manuscript. (b) AFM topography image of the part indicated by the sky-blue box in (a), showing stacks of lamellae. (c) Height profile along the red dotted line indicated in (b). (a) and (b) have a size of  $35 \times 35 \mu\text{m}^2$  and  $9 \times 9 \mu\text{m}^2$ , respectively.

## 8) Height profile of a stack of lamellar crystals

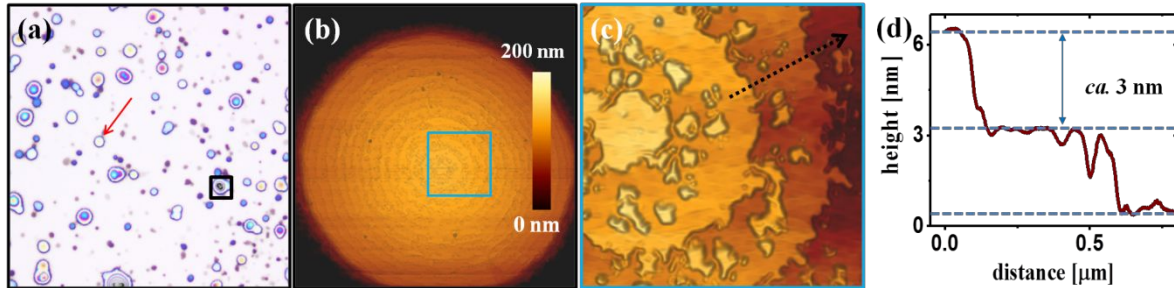

**S8:** (a) Optical micrograph presented in Figure 6 (g) in the main manuscript. (b) AFM topography image of the crystal indicated by the red arrow in (a). (c) AFM topography image of the part indicated by the sky-blue box in (b), showing stacks of lamellae. (d) Height profile along the black dotted line indicated in (c). The images (a), (b) and (c) have a size of  $200 \times 200 \mu\text{m}^2$ ,  $11 \times 11 \mu\text{m}^2$  and  $1.6 \times 1.6 \mu\text{m}^2$ , respectively.

## 9) Micrometer high quasi-single crystal

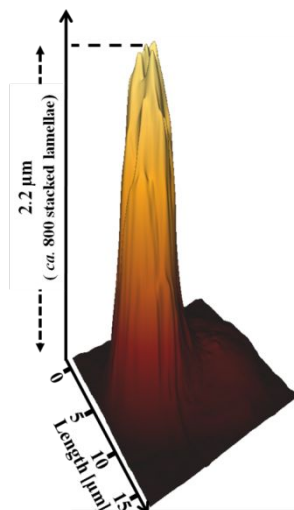

**S9:** AFM 3D image of the crystal shown in Figure 6 (h) in main text (indicated by the black box in Figure S8 (a)).

## Reference:

- (1) Schäffer, E. Instabilities in Thin Polymer Films: Structure Formation and Pattern Transfer, Universität Konstanz, 2001.
